# Supplementary material for: Do Metabolically Healthy People with Obesity Have a Lower Health-Related Quality of Life? A Prospective Cohort Study in Taiwan
Source: MDPI journal article supplement (doi:10.3390/jcm10215117), 2021-10-30
Supplement: s1 [file s1]

**Table S1.** Demographic characteristics at follow-up of 427 participants with complete follow-up assessment, classified by the metabolic health/BMI groups at follow-up.

|                                               | Total          | Metabolically healthy normal weight <sup>a</sup> | Metabolically healthy overweight <sup>a</sup> | Metabolically healthy obesity <sup>a</sup> | Metabolically un-healthy normal weight | Metabolically un-healthy overweight | Metabolically un-healthy obesity | <i>p</i> |
|-----------------------------------------------|----------------|--------------------------------------------------|-----------------------------------------------|--------------------------------------------|----------------------------------------|-------------------------------------|----------------------------------|----------|
|                                               | <i>n</i> = 427 | <i>n</i> = 195 (45.7%)                           | <i>n</i> = 52 (12.2%)                         | <i>n</i> = 21 (4.9%)                       | <i>n</i> = 55 (12.9%)                  | <i>n</i> = 45 (10.5%)               | <i>n</i> = 59 (13.8%)            |          |
| Age at follow-up, years, <i>n</i> (%)         |                |                                                  |                                               |                                            |                                        |                                     |                                  |          |
| 43–49                                         | 80 (19.2)      | 37 (19.0)                                        | 12 (23.1)                                     | 6 (28.6)                                   | 4 (7.3)                                | 6 (13.3)                            | 17 (28.8)                        | 0.04     |
| 50–59                                         | 221 (51.6)     | 106 (54.4)                                       | 28 (53.9)                                     | 12 (57.1)                                  | 26 (47.3)                              | 25 (55.6)                           | 24 (40.7)                        |          |
| 60–65                                         | 125 (29.2)     | 52 (26.7)                                        | 12 (23.1)                                     | 3 (14.3)                                   | 25 (45.5)                              | 14 (31.1)                           | 18 (30.5)                        |          |
| Mean age (SD)                                 | 55.8 (5.4)     | 55.5 (5.4)                                       | 55.6 (5.2)                                    | 54.4 (5.4)                                 | 58.0 (4.7)                             | 56.3 (5.2)                          | 55.4 (5.9)                       | <0.001   |
| Women, <i>n</i> (%)                           | 253 (59.3)     | 147 (75.4)                                       | 21 (41.2)                                     | 9 (42.9)                                   | 34 (61.8)                              | 21 (46.7)                           | 20 (33.9)                        |          |
| Mean BMI (SD), kg/m <sup>2</sup>              | 23.9 (4.0)     | 21.0 (1.7)                                       | 25.2 (0.8)                                    | 29.3 (2.3)                                 | 22.4 (1.3)                             | 25.5 (0.9)                          | 30.6 (3.8)                       |          |
| Married, <i>n</i> (%)                         | 366 (86.3)     | 162 (83.5)                                       | 46 (90.2)                                     | 19 (90.5)                                  | 48 (88.9)                              | 39 (88.6)                           | 51 (86.4)                        | 0.75     |
| Alcohol consumption, <i>n</i> (%)             | 86 (20.2)      | 28 (14.5)                                        | 12 (23.1)                                     | 6 (28.6)                                   | 16 (29.1)                              | 9 (20.0)                            | 15 (25.4)                        |          |
| Cigarette smoking, <i>n</i> (%)               |                |                                                  |                                               |                                            |                                        |                                     |                                  |          |
| Non-smokers                                   | 361 (84.7)     | 174 (89.7)                                       | 44 (84.6)                                     | 18 (85.7)                                  | 47 (85.5)                              | 35 (77.8)                           | 43 (72.9)                        | 0.07     |
| Smokers                                       | 35 (8.2)       | 12 (6.2)                                         | 5 (9.6)                                       | 1 (4.8)                                    | 6 (10.9)                               | 5 (11.1)                            | 6 (10.2)                         |          |
| Ex-smokers                                    | 30 (7.0)       | 8 (4.1)                                          | 3 (5.8)                                       | 2 (9.5)                                    | 2 (3.6)                                | 5 (11.1)                            | 10 (17.0)                        |          |
| Physical activity <sup>b</sup> , <i>n</i> (%) |                |                                                  |                                               |                                            |                                        |                                     |                                  |          |
| Low                                           | 221 (51.6)     | 89 (45.6)                                        | 32 (61.5)                                     | 13 (61.9)                                  | 26 (47.3)                              | 25 (55.6)                           | 35 (59.3)                        | 0.41     |
| Moderate                                      | 149 (34.8)     | 74 (38.0)                                        | 13 (25.0)                                     | 5 (23.8)                                   | 21 (38.2)                              | 16 (35.6)                           | 20 (33.9)                        |          |
| High                                          | 58 (13.6)      | 32 (16.4)                                        | 7 (13.5)                                      | 3 (14.3)                                   | 8 (14.6)                               | 4 (8.9)                             | 4 (6.8)                          |          |
| Education, <i>n</i> (%)                       |                |                                                  |                                               |                                            |                                        |                                     |                                  |          |
| Illiterate/elementary school                  | 9 (2.1)        | 4 (2.1)                                          | 1 (2.0)                                       | 0                                          | 1 (1.8)                                | 0                                   | 3 (5.1)                          | 0.09     |
| Senior/junior high school                     | 153 (35.9)     | 54 (27.7)                                        | 22 (43.1)                                     | 8 (38.1)                                   | 25 (45.5)                              | 22 (48.9)                           | 22 (37.3)                        |          |
| University and above                          | 264 (62.0)     | 137 (70.3)                                       | 28 (54.9)                                     | 13 (61.9)                                  | 29 (52.7)                              | 23 (51.1)                           | 34 (57.6)                        |          |
| SF-36 (mean ± SD)                             |                |                                                  |                                               |                                            |                                        |                                     |                                  |          |
| PCS                                           | 52.9 (6.2)     | 53.1 (6.1)                                       | 53.5 (6.0)                                    | 53.7 (6.4)                                 | 53.1 (5.9)                             | 52.9 (5.5)                          | 51.1 (7.0)                       | 0.34     |

|                      |            |            |            |             |            |            |             |      |
|----------------------|------------|------------|------------|-------------|------------|------------|-------------|------|
| MCS                  | 48.7 (8.2) | 49.0 (7.9) | 48.5 (7.9) | 48.0 (10.1) | 48.1 (8.2) | 49.3 (8.0) | 47.8 (9.2)  | 0.90 |
| Physical functioning | 53.0 (5.0) | 53.1 (4.9) | 53.8 (4.6) | 52.5 (5.6)  | 54.0 (4.0) | 52.7 (4.9) | 51.6 (6.0)  | 0.11 |
| Role-physical        | 51.7 (8.6) | 52.5 (8.1) | 51.2 (8.6) | 50.5 (10.2) | 50.6 (8.9) | 53.3 (7.2) | 49.9 (10.2) | 0.21 |
| Bodily pain          | 53.3 (8.0) | 52.9 (7.7) | 53.8 (7.8) | 56.4 (7.7)  | 53.4 (8.4) | 53.2 (8.4) | 53.2 (8.9)  | 0.59 |
| General health       | 47.1 (8.3) | 47.7 (8.3) | 47.7 (7.1) | 46.9 (9.1)  | 47.1 (8.9) | 47.9 (8.8) | 43.9 (7.9)  | 0.07 |
| Vitality             | 54.0 (7.5) | 54.1 (7.1) | 54.4 (7.3) | 53.1 (8.9)  | 54.3 (8.2) | 54.4 (7.5) | 52.9 (7.9)  | 0.87 |
| Social functioning   | 50.3 (6.1) | 50.8 (6.1) | 50.0 (6.4) | 48.9 (6.3)  | 50.4 (5.5) | 50.0 (6.2) | 49.5 (6.6)  | 0.64 |
| Role-emotional       | 50.6 (9.5) | 51.2 (8.9) | 51.0 (9.0) | 48.8 (11.3) | 50.0 (9.9) | 52.0 (8.1) | 48.8 (11.5) | 0.44 |
| Mental health        | 47.0 (8.2) | 46.9 (8.1) | 46.4 (7.3) | 49.1 (8.5)  | 46.9 (8.5) | 47.7 (8.2) | 46.7 (9.0)  | 0.83 |

Note. SD=standard deviation; BMI= body mass index; SF-36 = the Short Form Health Survey; PCS=physical component summary; MCS=mental component summary. Chi-square tests and Fisher's exact tests were used for categorical variables. Unbalanced ANOVA tests were used for continuous variables. <sup>a</sup>Metabolic health was defined as (1) absence of known chronic diseases including hypertension, hyperlipidemia, diabetes, coronary artery disease, stroke and vascular diseases; (2) presence of  $\leq 1$  metabolic risk factor, including hypertension, hyperglycemia, hypertriglyceridemia, and low serum high-density lipoprotein cholesterol. <sup>b</sup>Physical activity was evaluated by the International Physical Activity Questionnaire (IPAQ) Short-Form, Taiwan version.

**Table S2.** The association between metabolic health/BMI groups and HRQOL with different reference groups.

| <b>Model A</b>       | <b>Metabolically healthy overweight</b> | <b>Metabolically unhealthy overweight</b> |
|----------------------|-----------------------------------------|-------------------------------------------|
| PCS                  | Reference group                         | 0.37 (-0.96, 1.70)                        |
| MCS                  | Reference group                         | 0.64 (-0.89, 2.18)                        |
| Physical functioning | Reference group                         | 0.10 (-0.87, 1.07)                        |
| Role-physical        | Reference group                         | 2.34 (0.57, 4.12)                         |
| Bodily pain          | Reference group                         | 0.51 (-1.32, 2.35)                        |
| General health       | Reference group                         | -0.42 (-2.31, 1.48)                       |
| Vitality             | Reference group                         | -0.34 (-1.59, 0.90)                       |
| Social functioning   | Reference group                         | 0.21 (-1.59, 2.01)                        |
| Role-emotional       | Reference group                         | 1.51 (-0.51, 3.54)                        |
| Mental health        | Reference group                         | 0.83 (-0.64, 2.31)                        |
| <b>Model B</b>       | <b>Metabolically healthy obesity</b>    | <b>Metabolically unhealthy obesity</b>    |
| PCS                  | Reference group                         | -3.37 (-5.16, -1.59)                      |
| MCS                  | Reference group                         | 1.53 (-0.28, 3.33)                        |
| Physical functioning | Reference group                         | -0.47 (-1.88, 0.94)                       |
| Role-physical        | Reference group                         | -2.25 (-4.55, 0.04)                       |
| Bodily pain          | Reference group                         | -2.87 (-5.15, -0.59)                      |
| General health       | Reference group                         | -4.94 (-7.25, -2.63)                      |
| Vitality             | Reference group                         | 1.27 (-0.36, 2.89)                        |
| Social functioning   | Reference group                         | 1.77 (-0.33, 3.86)                        |
| Role-emotional       | Reference group                         | -1.26 (-3.83, 1.32)                       |
| Mental health        | Reference group                         | 0.94 (-0.84, 2.72)                        |

Note. BMI = body mass index; HRQOL= health-related quality of life; PCS= physical component summary; MCS= mental component summary. The reference group was metabolically healthy overweight in model A and metabolically healthy obesity in model B. The analyses were conducted by generalized linear mixed models with adjustment for age, sex, marital status, level of education, smoking, alcohol consumption, groups of physical activity, and follow-up years.
